# Supplementary material
Source: publisher figshare collection journal article supplement (https://karger.figshare.com/ndownloader/files/40870757)
Supplement: Supplementary file 1 [file 40870757]

Supplementary Table S3. Causes of graft loss

| Causes of graft loss | Total  n=387 | Group 1  n=117 | Group 2  n=158 | Group 3  n=112 | p |
| --- | --- | --- | --- | --- | --- |
| Chronic nephropathy % | 23.3 | 21.7 | 21.4 | 27.9 | 0.825 |
| Infectious % | 19.2 | 26.1 | 14.3 | 18.2 | 0.523 |
| Surgical % | 19.2 | 13 | 14.3 | 0 | 0.234 |
| Primary failure % | 16.4 | 17.4 | 21.4 | 9.1 | 0.635 |
| Immunological % | 12.3 | 13 | 7.1 | 18.2 | 0.455 |
| Others % | 12.3 | 4.3 | 10.7 | 22.0 | 0.233 |
| BK nephropathy % | 6.8 | 4.3 | 10.7 | 4.5 | 0.532 |
